# Supplementary material for: Xeno-Free Integrated Platform for Robust Production of Cardiomyocyte Sheets from hiPSCs
Source: Stem Cells Int. 2022 Nov 23;2022:4542719. doi: 10.1155/2022/4542719 (PMC9712013; doi:10.1155/2022/4542719)
Supplement: Supplementary Materials — Supplementary Table S1: primer pairs used for real-time PCR. Supplementary Figure S1: optimization of cardiomyocyte differentiation and replating using different culture systems. Supplementary Figure S2: purification and enrichment steps optimization. Supplementary Video S1: time-lapse of the first 7 days of cardiac differentiation using the Wnt signaling protocol. Supplementary Video S2: cardiac sheet obtained at day 15 using 6 μm of CHIR to induce cardiac differentiation of hiPSC growing in Matrigel-coated plates. Supplementary Video S3: representative example of cellular and cardiomyocyte sheet detachment from plates with xeno-free coatings. Supplementary Video S4: detachment observed at day 15 by the naked eye for hiPSC in Synthemax-coated plates differentiated using 6 μM of CHIR and with or without exposure to the purification and enrichment steps. Supplementary Video S5: replating 1 : 1 at day 6 allowed the reconstitution of the CM sheets with contraction visible by the naked eye at day 15. [file 4542719.f1.zip]

Archive with 6 entries (6 files):
- Supp Info.pdf
- Video S1.mp4
- Video S2.mp4
- Video S3.mp4
- Video S4.MOV
- Video S5.MOV
